# Supplementary material for: An analytical formulation for turbulent kinetic energy added by wind turbines based on large-eddy simulation
Source: Copernicus journal article supplement (doi:10.5194/wes-2024-128), 2024-10-28
Supplement: Supplementary file [file wes-2024-128-AC2-supplement.pdf]

# Reply to the reviewers of “An analytical formulation for turbulent kinetic energy added by wind turbines based on large-eddy simulation”

22 January 2025

Please note that the reviewers’ comments are in *italic*, our responses in regular font, and the changes to the manuscript in blue color.

## Reviewer #1

*The paper presents a new analytical formulation for turbulent kinetic energy in the wake of a single wind turbine. The model proposes a detailed three-dimensional description of the tke field, intended to remain valid in both the near and far wake regions. In total, 15 parameters are introduced and calibrated against the results of large-eddy simulations through a two-step least-squares method. The paper is clear, easy to read, and has the potential to contribute to the improvement of the latest wake models.*

*Major comments:*

- *Line 189, 203: For both Weibull-like laws, the shape parameters are set before starting the fitting process. The authors should motivate the choice of the values  $k_A=2$  and  $k_W=4$ , and clarify why those parameters are not fitted using the two-step least-squares method.*

We really appreciate the comment because we too have actually tried to find the fitted values for  $k_A$  and  $k_W$ . Unfortunately, we could never get convergence with a total of 7 parameters, thus we had to reduce the number of parameters and select reasonable values for  $k_A$  and  $k_W$  manually. The choice of  $k_A = 2$  is motivated by the need for the fitting function  $A(x)$  to be exactly zero at  $x_0$  (only possible for  $k_A > 1$ ) and to be rapidly increasing past  $x_0$ , but not too rapidly (which would be the case for  $k_A < 2$ ). For  $k_W$ , by trial and error we found that a value of 4 would give a steep increase in  $TKE$  above the rotor top and a gentler decrease below it, as shown in the LES results. We added the following in the manuscript around line 190:

We set  $k_A = 2$  to reduce the overall number of parameters to fit and to obtain a function with the desired properties, i.e., equal to zero at  $x_0$  (thus  $k_A > 1$ ) and rapidly increasing past  $x_0$ , but not too rapidly (which would be the case for  $k_A < 2$ ).

and around line 205:

... the shape parameter  $k_W$  is set equal to 4 after a trial-and-error process to ensure a steeper decrease in  $\Delta TKE$  above the top tip than below it, as shown in the LES results.

and around line 248:

We attempted to find fitted values also for  $k_A$  and  $k_W$ , but with 7 parameters we could never reach convergence of the least-square error fitting procedure.

- *Line 274: The authors claim that  $kr$  is independent of  $CT$ . However, Figure 2b shows differences up to 20% between the value of  $kr$  at  $CT=0.4$  and at  $CT=0.9$ . It would perhaps be interesting to consider an expression other than  $CT^b$  for the fitting.*

We would like to clarify that the dotted lines shown in Figure 2b are not those obtained with  $b=0$ , but they are the original result of the fitting procedure, with  $b = -0.061$ . Since the lines are almost perfectly horizontal, the dependency on  $C_T$  is insignificant, which is why we wrote in the manuscript that  $k_r$  is basically independent of  $C_T$  (now we say that “the fit for  $k_r$ ” is).

We agree that the original points (not the fitted lines) show a weak dependency on the thrust coefficient. However, this dependency is confusing. For the high TI cases (VPA-TI108), it is slightly decreasing with  $C_T$ , but for low TI cases (VPA-TI064) it is slightly increasing. We believe that this is the reason why the least-square error fit produced a flat line. We added the following around line ...:

By contrast, the fit for  $k_r$  (Fig. 2b) is basically independent of  $C_T$ , despite a weak and conflicting dependency in the direct-fitting values, thus  $b$  is overwritten as zero from the original value of  $-0.061$  in Table 2.

As much as we would like to try your suggestion of using a different functional relationship for  $C_T$ , at this point it would be too massive an effort. Plus the power function has been used in the literature.

- *Figure 2: Because the form of Eq. 15 cannot capture the stability conditions, the differences between the “direct fit” values and that of the functional relationships are often large in the stable and unstable cases. For consistency, shouldn’t only neutral conditions be used for calibration?*

In general, stable conditions are characterized by lower  $TI$  than unstable conditions, thus the reasoning behind picking  $TI$  as the metric for atmospheric conditions was that it would be a decent (although not perfect) proxy for stability. In addition, we want a set of functions that could be used in all stability conditions. If we only calibrated our coefficients on neutral cases, then we would not be able to capture other stabilities at all. By including stable and unstable cases in the calibration, the proposed fitting functions are better equipped to treat non-neutral conditions. Lastly, the stable and unstable cases were clear outliers only for  $\varepsilon_r$ , as discussed in the manuscript; in the validation, the stable case (SOWFA) was the one with the lowest error (Table 3).

- *Line 305: The authors should clarify what they mean by “entire wake regions” and specify the limits of the regions along  $y$  and  $z$  as well, as this will influence the value of the RMSE.*

Ali, write the exact limits that you used for the wake regions [That’s true the size of wake region influence the value of the RMSE, indeed. Thus, in this study, The entire wake region covers an area with  \$y\$  from  \$-1D\$  to  \$+1D\$  and  \$z\$  from  \$0-2H\$ . Please note that we have different values along the  \$x\$  direction as some LES cases and the experimental test just cover a small regions in downstream](#)

#### Minor comments

- *Line 6: The notation  $x = 4 - 6D$  appears a bit confusing. It might be worth considering an alternative notation.*

Changed to [4D–6D](#).

- *P2: The introduction is rich and well-documented. However, the relevance of the section between lines 28 and 46 is questionable in the scope of this work as it addresses velocity deficit models.*

The discussion was tightened and the two paragraphs were shortened into one, giving a reduction of the number of lines of text from 21 to 13.

- *Line 76: “We note that also Eq. 1 and 2 can be reduced to the same form”. This is not true for  $CT$  in the case of Eq. 2. The authors should maybe re-phrase this sentence for consistency.*

The sentence was rephrased as follows:

[We note that also Eq. 1 can be reduced to this same form and Eq. 2 to a close form \(with  \$\(1 - \sqrt{1 - C\_T}\)^b\$  instead of  \$C\_T^b\$ \).](#)

- *Line 133: Typo “u, v, andw”*

Done.

- *Line 160: Different definitions of  $\Delta TI$  exist in the literature. It is worth clarifying which one is used and its connection to  $\Delta TKE$ .*

We added the following:

In particular, the relationship used in this study between added TI ( $\Delta TI$ ) and added TKE ( $\Delta TKE$ ) is:

$$\Delta TI = \sqrt{\frac{2}{3}} \frac{\Delta TKE}{\bar{U}} = \sqrt{\frac{2}{3}} \frac{TKE - TKE_{\infty}}{\bar{U}},$$

where  $TKE_{\infty}$  is, broadly speaking, the free-stream turbulent kinetic energy. The exact definition of  $TKE_{\infty}$  depends on the type and distribution of the available data. If three-dimensional simulation data are available from a run without turbines (i.e., a precursor run) and a run with turbines, then the point-by-point difference of the time-averaged TKE of the two runs is used to calculate  $\Delta TKE$ , e.g., for the validation LES datasets described in Section 2.2. If only a simulation with turbines is available, as is the case for the validation LES datasets described in Section 3.2, then the vertical profile of TKE at an upstream distance of  $x = x_0 - 2D$  is obtained by calculating at each level the average of TKE over  $-3D \leq y - y_0 \leq +3D$ , where  $x_0, y_0$  are the coordinates of the turbine. The value of  $TKE_{\infty}$  to use at each point downstream is, then, the value of TKE in the upstream vertical profile at the same vertical level.

- *Line 189: The expression selected for  $A(x)$  is very similar to the one proposed by T Delvaux et al 2024 Phys.: Conf. Ser. 2767 092089. The authors could consider providing additional reference for it.*

Thank you for bringing this article to our attention. We added it to the list of references and cited it in the manuscript around line 192 as follows:

The Weibull distribution was also recently proposed for the  $x$ -dependency of added  $TI$  by Delvaux et al. (2024, their Eq. 3).

- *Line 194: Missing space after the bracket.*

Done.

- *Line 277, 279: Missing space before the bracket.*

Done.

- *Line 351: Typo “citeWuetal2023”*

Fixed.

- *3.2: The proposed model appears to outperform the model of Ishara and Qian (2018) in most of the validation cases. The comparison could be further enriched with the 3D model of Tian et al. (2022).*

We added a comparison of the TIAN2022 performance in Figures 5–7 and Table 3.
